# Supplementary material for: Surface expression marker profile in colon cancer cell lines and sphere-derived cells suggests complexity in CD26+ cancer stem cells subsets
Source: PubMed Central journal article supplement (PMC6679411; doi:10.1242/bio.041673), 2019-07-08
Supplement: biolopen-8-041673-s1.pdf [file biolopen-8-041673-s1.pdf]

## SUPPLEMENTARY FIGURES

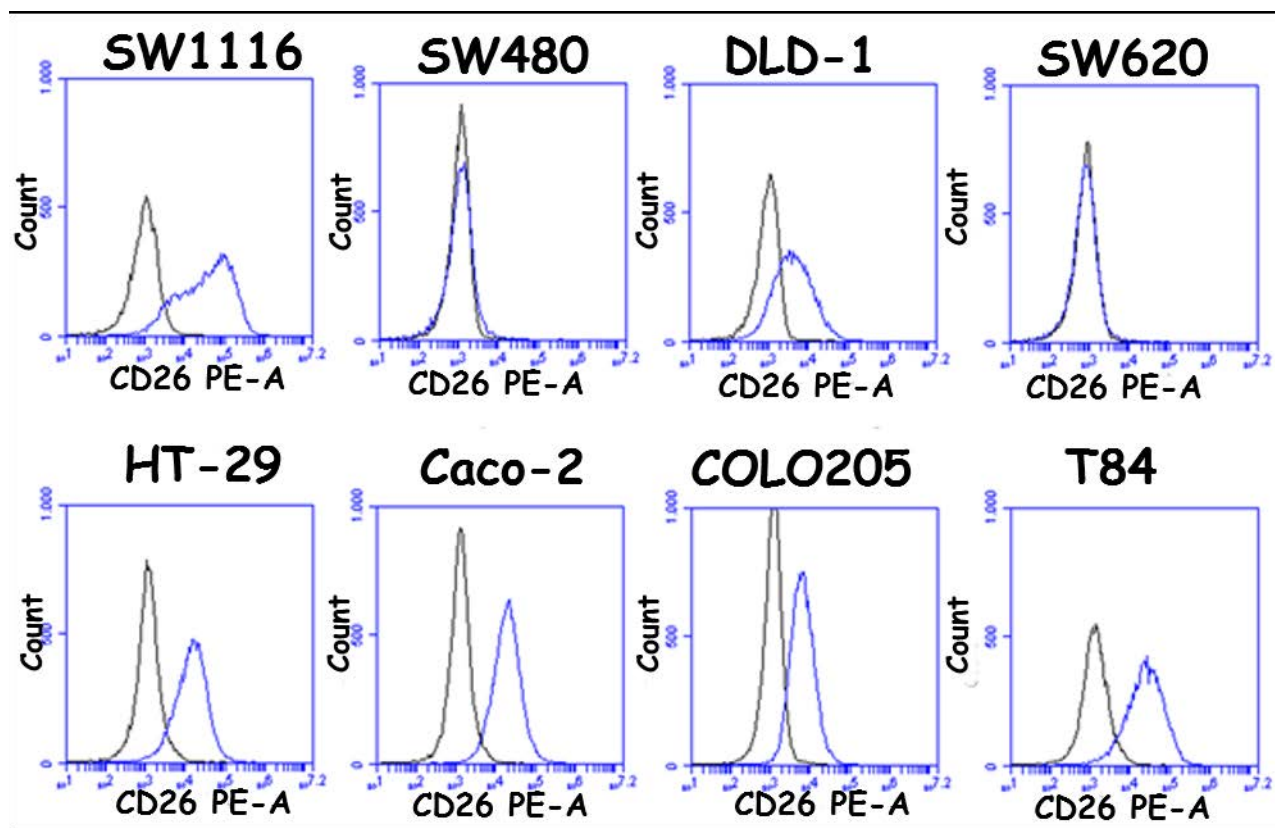

**Fig S1.** Flow cytometry analysis of CD26 expression in the eight human colon cancer cell lines analysed. Viable cells were gated and expression of CD26 was analysed (black line marks negative cells).

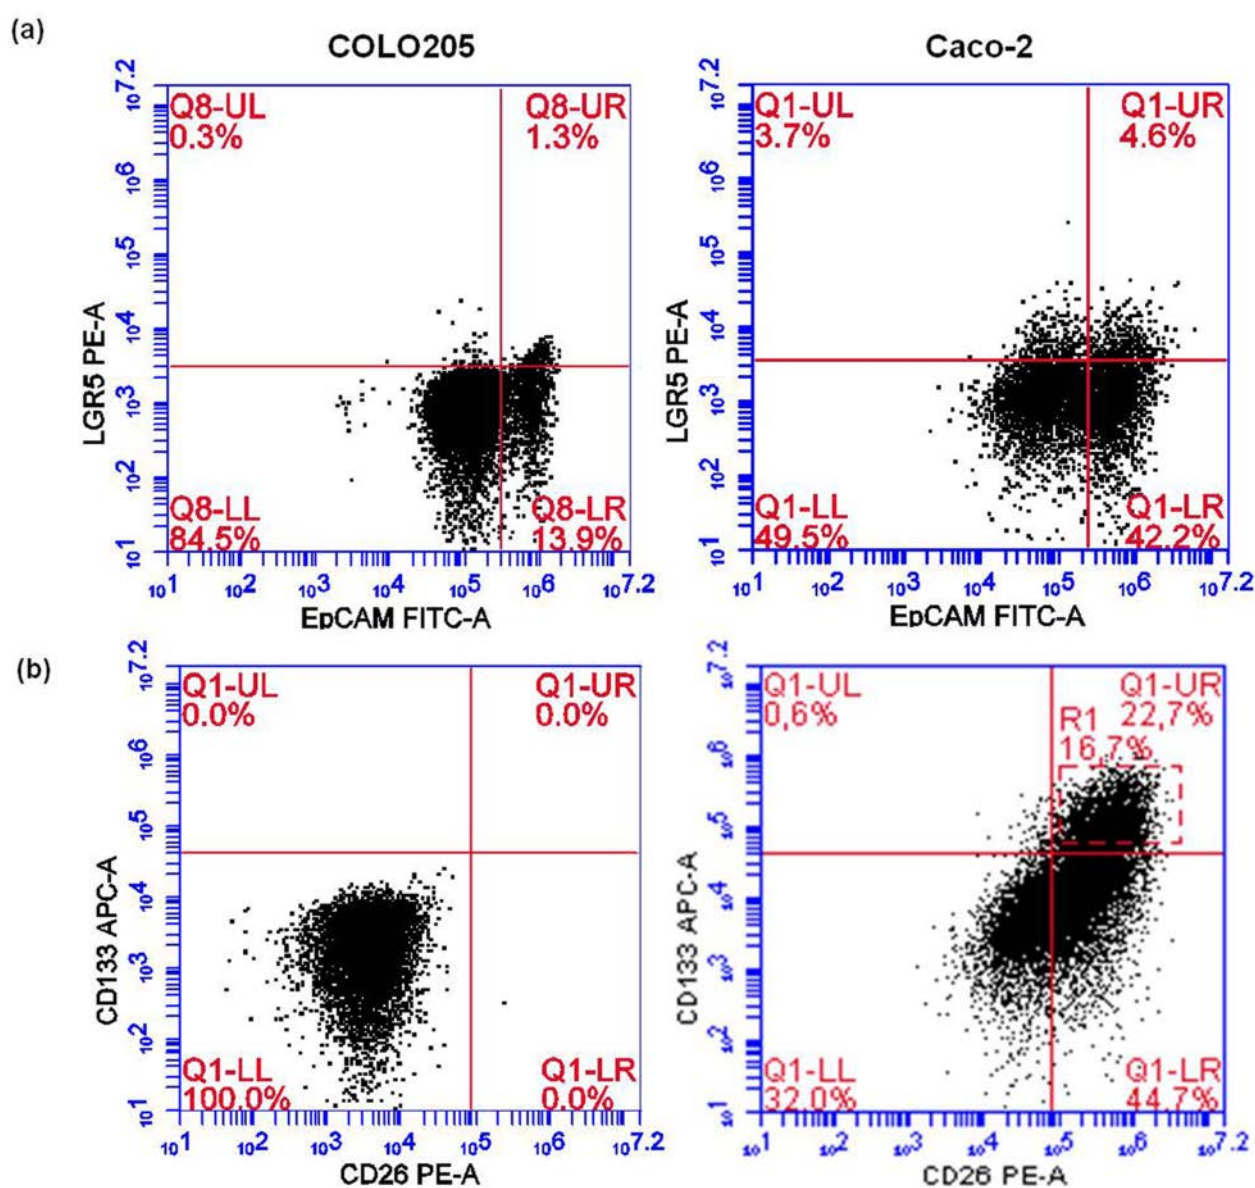

**Fig S2.** Flow cytometry analysis of candidate surface markers LGR5, EpCAM, CD133 and CD26. Representative dot plots are shown in COLO205 and Caco-2 cell lines. a) LGR5 vs EpCAM dot plots, b) CD133 vs CD26 dot plots. Quadrant R1 in Caco-2 dot plot (b) represents high expression CD133/CD26 subset.

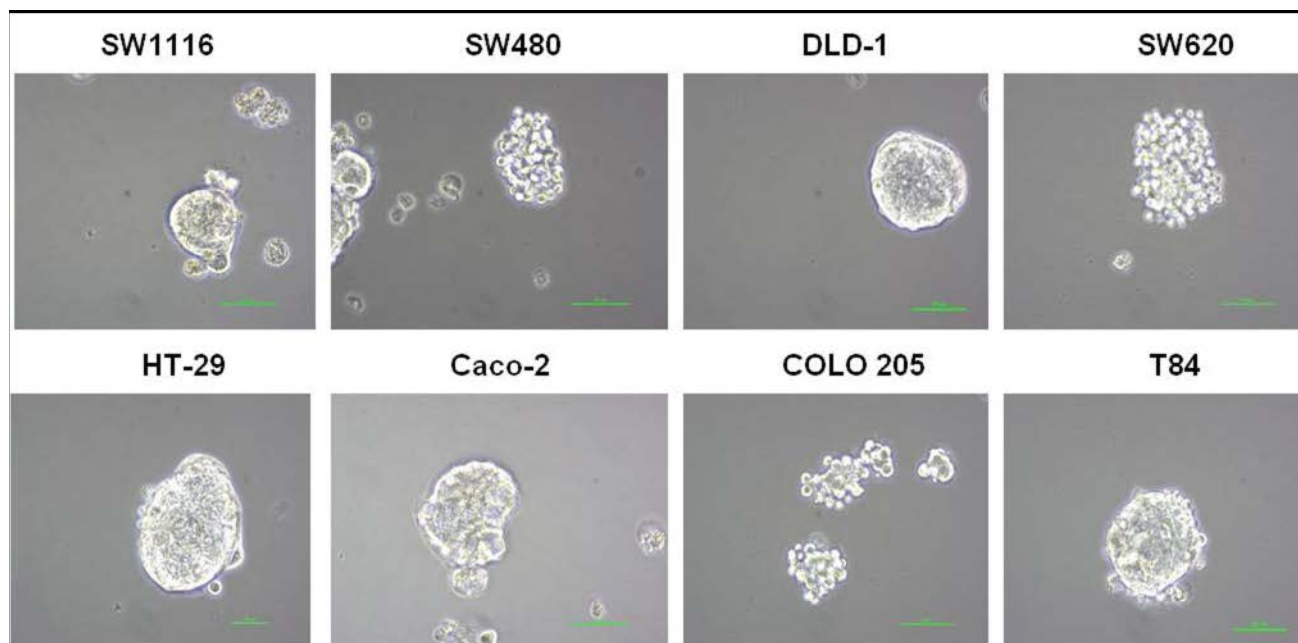

**Fig S3.** Morphology of spheres generated from colon cancer cells lines after 7 days in SFM. Representative pictures of spheres from SW1116, SW480, DLD-1, SW620, HT-29, Caco-2, COLO205 and T84 are shown. Scale bars: 50  $\mu$ m.

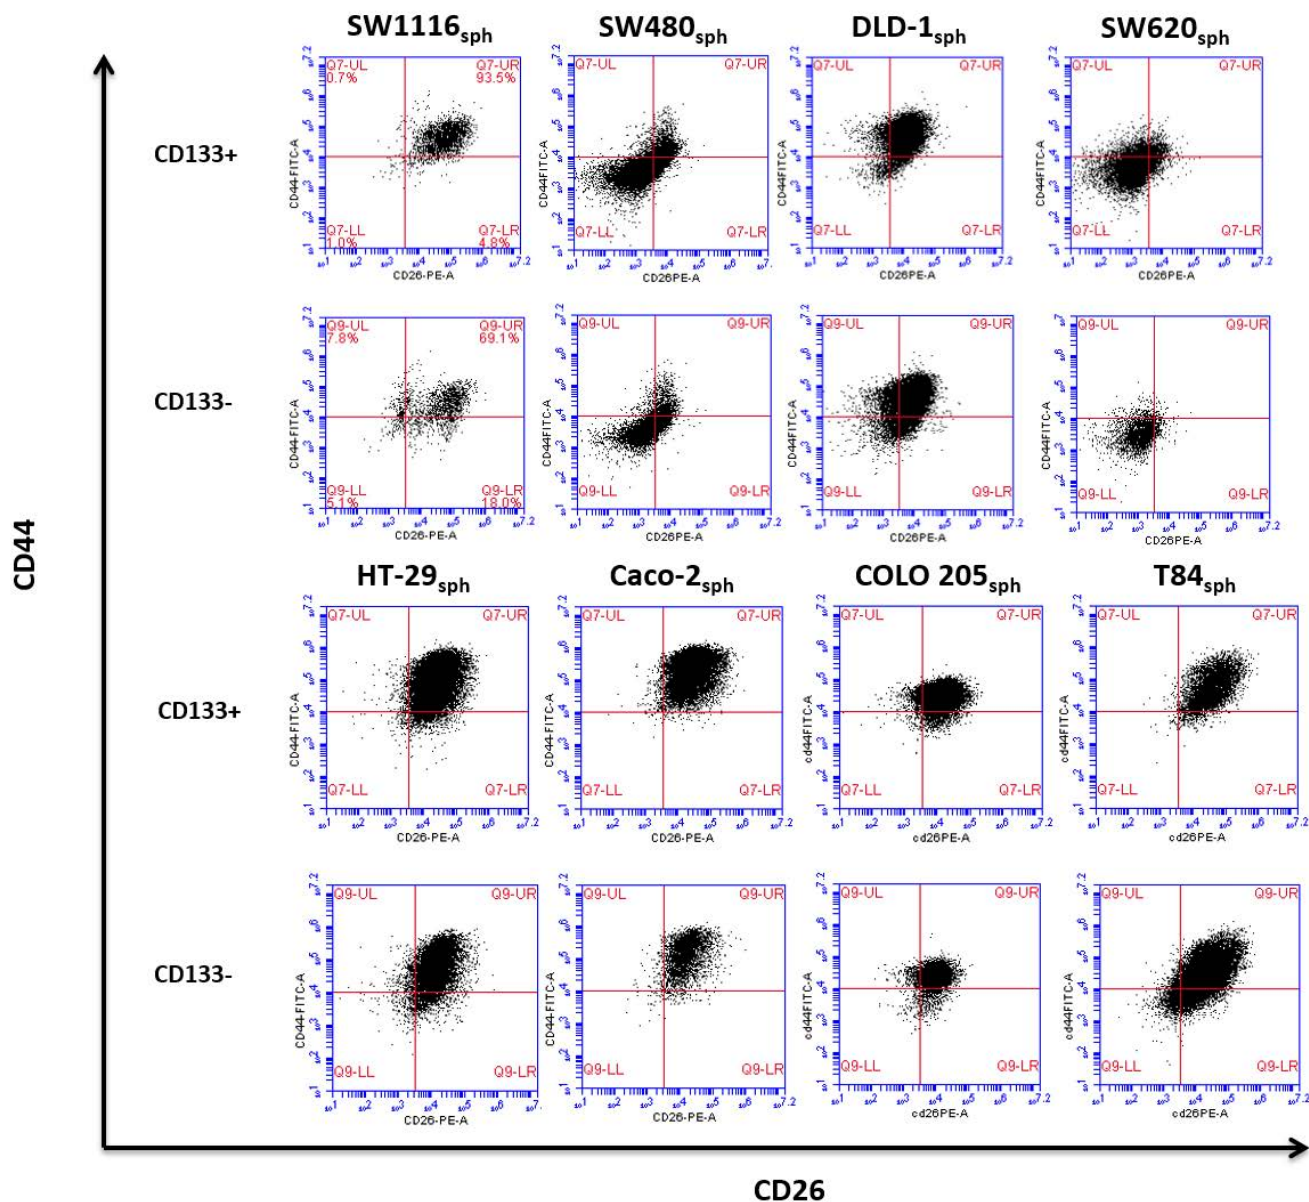

**Fig S4.** Expression of CD44 and CD26 in sphere-derived cells E-cadherin<sup>+</sup> CD133<sup>+</sup> or CD133<sup>-</sup> subsets. Orange bar marks the presence of CD26<sup>high</sup> population as defined in cell line dot plots.

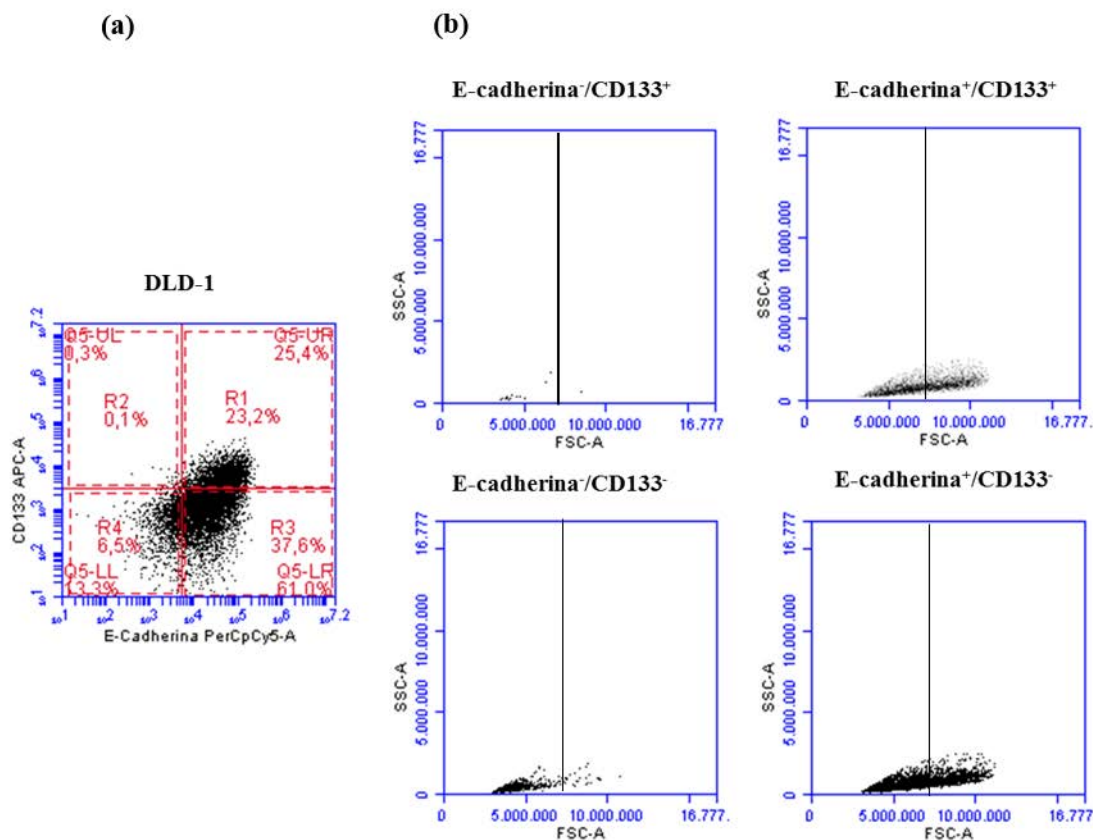

**Fig S5.** Physical (FCS vs SSC) dot plot analyses of sphere-derived cells gated for E-cadherin vs CD133 expression. a) Dot plot analysis of E-cadherin vs CD133 expression in DLD-1<sub>sph</sub>; b) Physical gating (FCS vs SSC) of the four regions (1 to 4) from the E-cadherin vs CD133 dot plot.

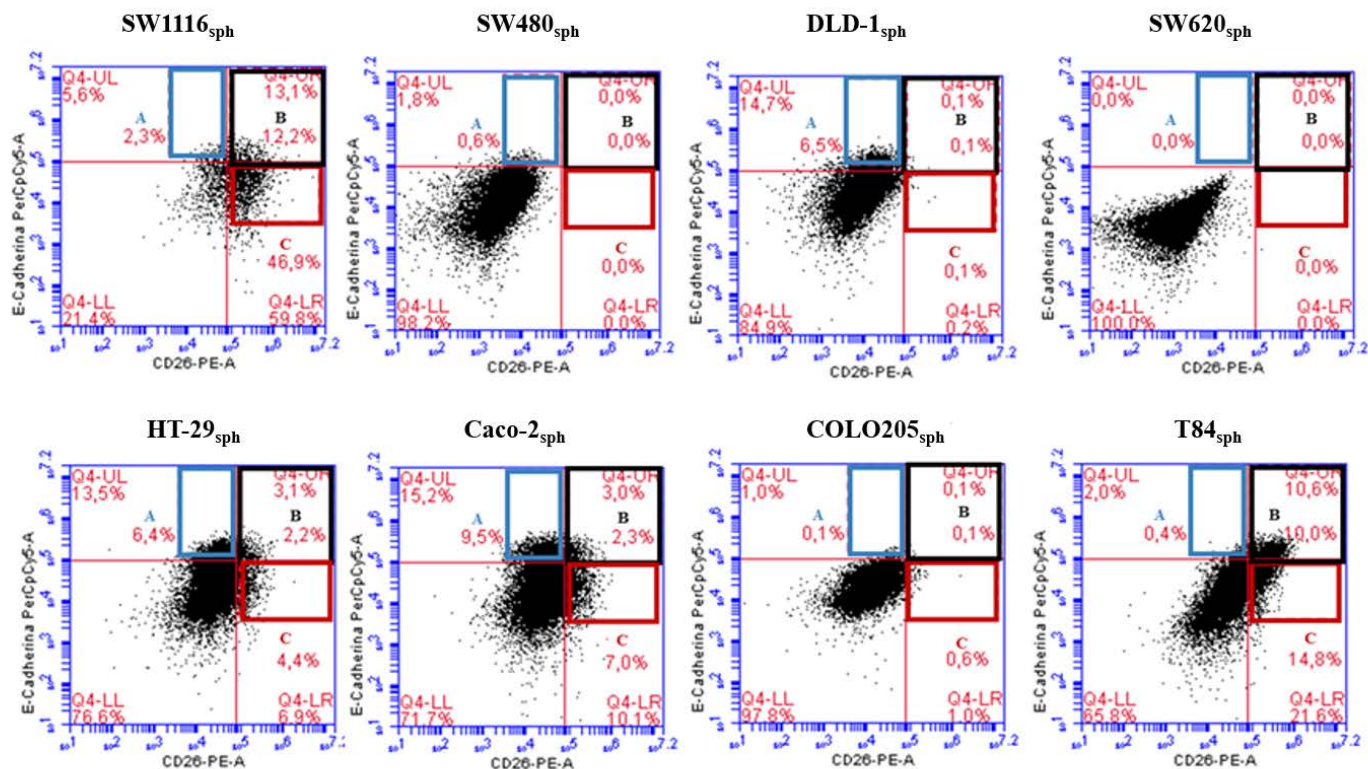

**Fig S6.** Analysis of CD26 and E-cadherin expression in sphere-derived cells. T84<sub>sph</sub> showed a subset with a stronger coexpression (CD26<sup>high</sup> E-cadherin<sup>high</sup>, region B).

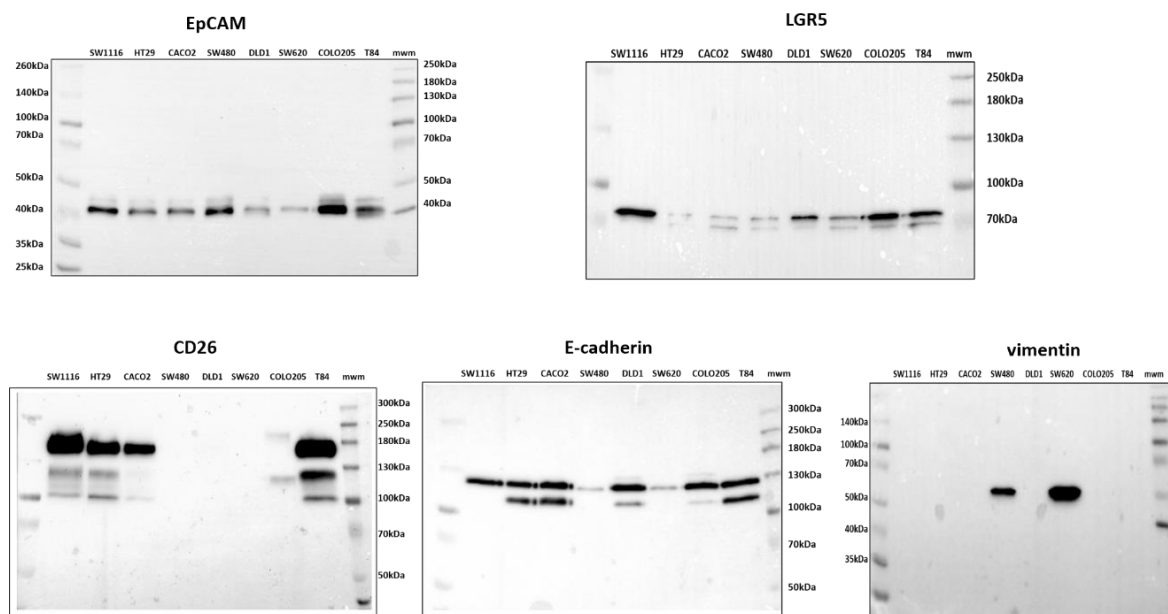

**Fig S7.** Full-length blots of expression of different markers in the eight human colon cancer cell lines analysed (which were shown in different order in Fig 1).

## Supplemental Tables

**Table S1. Colon cancer cell lines origin**

| Cell line       | Disease                   | Dukes Stage | Derived from                | References |
|-----------------|---------------------------|-------------|-----------------------------|------------|
| <b>SW1116</b>   | Colorectal adenocarcinoma | A           | Primary tumor               | (a)        |
| <b>SW480</b>    | Colorectal adenocarcinoma | B           | Primary tumor               | (a)        |
| <b>DLD-1</b>    | Colorectal adenocarcinoma | C           | Primary tumor               | (b)        |
| <b>SW620</b>    | Colorectal adenocarcinoma | C           | Metastatic site: Lymph node | (a)        |
| <b>HT-29</b>    | Colorectal adenocarcinoma | n.i.        | Primary tumor               | (c)        |
| <b>Caco-2</b>   | Colorectal adenocarcinoma | n.i.        | Primary tumor               | (d)        |
| <b>COLO 205</b> | Colorectal adenocarcinoma | D           | Metastatic site: ascites    | (e)        |
| <b>T84</b>      | Colorectal carcinoma      | n.i.        | Metastatic site: lung       | (f)        |

n.i.: Not indicated in ATCC.



- a. Zimmerer RM, Korn P, Demougin P, Kampmann A, Kokemüller H, Eckardt AM, Gellrich NC, Tavassol F. Functional features of cancer stem cells in melanoma cell lines. *Cancer Cell Int.* 2013; 6;13(1):78. doi: 10.1186/1475-2867-13-78.
- b. Leibovitz A, Stinson JC, McCombs WB 3rd, McCoy CE, Mazur KC, Mabry ND. Classification of human colorectal adenocarcinoma cell lines. *Cancer Res.* 1976; 36(12):4562-9.
- c. Chen TR, Hay RJ, Macy ML. Intercellular karyotypic similarity in near-diploid cell lines of human tumor origins. *Cancer Genet. Cytogenet.* 1983; 10: 351-362.
- d. Fogh J. *Human tumor cells in vitro.* New York: Plenum Press. 1975.
- e. Goodfellow M, Fogh JM, Orfeo T. One hundred and twenty-seven cultured human tumor cell lines producing tumors in nude mice. *J. Natl. Cancer Inst.* 1977; 59: 221-226.
- f. Semple TU, Quinn LA, Woods LK, Moore GE. Tumor and lymphoid cell lines from a patient with carcinoma of the colon for a cytotoxicity model. *Cancer Res.* 1978; 38: 1345-1355.

**Table S2. Frequencies of autofluorescent cells in colon cancer cell lines.**

| <b>Cell line</b> | <b>(-R)<br/>%</b><br>M ± s.d. | <b>(+R)<br/>%</b><br>M ± s.d. |
|------------------|-------------------------------|-------------------------------|
| SW1116           | n.d.                          | n.d.                          |
| SW480            | 0.3 ± 0.001                   | 1 ± 0.001                     |
| DLD-1            | 0.4 ± 0.001                   | 0.6 ± 0.001                   |
| SW620            | 0.2 ± 0                       | 0.2 ± 0                       |
| HT-29            | 2.9 ± 0.003                   | 3.6 ± 0.006                   |
| Caco-2           | 0.7 ± 0.001                   | 1 ± 0.001                     |
| COLO205          | 0.5 ± 0.001                   | 0.7 ± 0.001                   |
| T84              | n.d.                          | n.d.                          |

(-R) Without riboflavin; (+R) With riboflavin

n.d.: Not determined

M: Mean of three experiments

s.d.: Standard deviation

**Table S3. Frequencies of the subpopulations that express two markers in the colon cancer cell lines.**

| Cell<br>line | CD133 <sup>+</sup> |                   |                         | CD26 <sup>+</sup> |                         | CD44 <sup>+</sup>       | LGR5 <sup>+</sup>  |
|--------------|--------------------|-------------------|-------------------------|-------------------|-------------------------|-------------------------|--------------------|
|              | CD44 <sup>+</sup>  | CD26 <sup>+</sup> | E-cadherin <sup>+</sup> | CD44 <sup>+</sup> | E-cadherin <sup>+</sup> | E-cadherin <sup>+</sup> | EpCAM <sup>+</sup> |
|              | %                  | %                 | %                       | %                 | %                       | %                       | %                  |
|              | M ± s.d.           | M ± s.d.          | M ± s.d.                | M ± s.d.          | M ± s.d.                | M ± s.d.                | M ± s.d.           |
| SW1116       | 3.9 ± 2.7          | 12.8 ± 8.0        | 11.3 ± 6.7              | 25.0 ± 7.3        | 56.3 ± 7.5              | 16.8 ± 7.2              | 10.2 ± 1           |
| SW480        | 2.9 ± 3.2          | 0.7 ± 0.3         | 2.8 ± 0.7               | 2.1 ± 0.5         | 2.3 ± 0.8               | 33.8 ± 15.9             | 9 ± 0.1            |
| DLD1         | 11.6 ± 8.1         | 9.2 ± 6.8         | 11.3 ± 12.5             | 25.1 ± 7.8        | 17.2 ± 8.0              | 29.3 ± 6.0              | 9 ± 1              |
| SW620        | 1.5 ± 1.6          | 0.9 ± 1.1         | 14.9 ± 7.3              | 0.1 ± 0           | 0.4 ± 0.3               | 2.0 ± 0.9               | 3.7 ± 1.3          |
| HT-29        | 53.3 ± 16.1        | 47.0 ± 14.5       | 34.7 ± 10.6             | 64.5 ± 7.7        | 69.0 ± 3.2              | 62.7 ± 4.3              | 9.1 ± 4.1          |
| Caco-2       | 83.4 ± 1.7         | 78.7 ± 3.2        | 66.4 ± 22.8             | 84.9 ± 4.9        | 83.3 ± 8.9              | 87.7 ± 5.1              | 15.9 ± 6.4         |
| COLO205      | 10.6 ± 9.4         | 32.1 ± 15.3       | 56.5 ± 27.1             | 2.6 ± 1.4         | 68.1 ± 13.9             | 2.5 ± 2.7               | 8.9 ± 3.5          |
| T84          | 1.3 ± 1.4          | 2.0 ± 1.9         | 4.2 ± 4.1               | 30.8 ± 16.5       | 82.1 ± 6.2              | 19.8 ± 6.1              | 25.8 ± 4.4         |

M: Mean of three experiments

s.d.: Standard deviation

**Table S4. Frequencies of CD26<sup>high</sup> in colon cancer cell lines.**

| <b>Cell line</b> | <b>CD26<sup>high</sup></b><br>%<br>M ± s.d. |
|------------------|---------------------------------------------|
| SW1116           | 41.9 ± 9.2                                  |
| SW480            | -                                           |
| DLD-1            | 0.1 ± 0.1                                   |
| SW620            | -                                           |
| HT-29            | 2.1 ± 0.4                                   |
| Caco-2           | 65.3 ± 4.6                                  |
| COLO205          | 0.1 ± 0.1                                   |
| T84              | 12.0 ± 2.9                                  |

M: Mean of three experiments

s.d.: Standard deviation

-: Not detected

**Table S5. Frequencies of CD26/E-cadherin subsets in colon cancer cell lines.**

| Cell line | CD26 <sup>high</sup>       |                           | E-cadherin <sup>high</sup> |
|-----------|----------------------------|---------------------------|----------------------------|
|           | E-cadherin <sup>high</sup> | E-cadherin <sup>low</sup> | CD26 <sup>low</sup>        |
|           | %<br>M ± s.d.              | %<br>M ± s.d.             | %<br>M ± s.d.              |
| SW1116    | 7.8 ± 5.3                  | 15.3 ± 5.7                | 0.8 ± 0.7                  |
| SW480     | -                          | -                         | -                          |
| DLD-1     | -                          | 0.1 ± 0.1                 | 6.9 ± 5.4                  |
| SW620     | -                          | -                         | 0.125 ± 0.25               |
| HT-29     | 1.30 ± 1.07                | 0.45 ± 0.24               | 22.03 ± 16.93              |
| Caco-2    | 6.0 ± 5.3                  | 12.7 ± 22.7               | 35.4 ± 23.3                |
| COLO205   | 0.1 ± 0.2                  | -                         | 55.3 ± 22.4                |
| T84       | 2.4 ± 1.6                  | 11.2 ± 6.0                | 1.2 ± 0.8                  |

M: Mean of three experiments

s.d.: Standard deviation

-: Not detected

**Table S6. Frequencies of CD133/E-cadherin subsets in colon cancer cell lines.**

| Cell line | CD133 <sup>high</sup>      |                           | E-cadherin <sup>high</sup> |
|-----------|----------------------------|---------------------------|----------------------------|
|           | E-cadherin <sup>high</sup> | E-cadherin <sup>low</sup> | CD133 <sup>low</sup>       |
|           | %<br>M ± s.d.              | %<br>M ± s.d.             | %<br>M ± s.d.              |
| SW1116    | 0.1 ± 0.2                  | 0.2 ± 0.2                 | 1.8 ± 1.9                  |
| SW480     | -                          | -                         | 0.05 ± 0.06                |
| DLD-1     | -                          | -                         | 4.85 ± 4.24                |
| SW620     | -                          | 0.50 ± 0.63               | 0.30 ± 0.54                |
| HT-29     | 0.03 ± 0.05                | 0.25 ± 0.38               | 10.43 ± 7.40               |
| Caco-2    | 1.95 ± 2.47                | 4.30 ± 5.19               | 42.88 ± 18.89              |
| COLO205   | 0.10 ± 0.14                | 0.08 ± 0.10               | 1.0 ± 0.82                 |
| T84       | -                          | -                         | 0.18 ± 0.05                |

M: Mean of three experiments

s.d.: Standard deviation

-: Not detected

**Table S7. Properties of the spheres obtained from the colon cancer cell lines.**

| Cell line | Sphere formation | Number of generations | Cells/mL                                                                                                                                     | Radius of spheres    |
|-----------|------------------|-----------------------|----------------------------------------------------------------------------------------------------------------------------------------------|----------------------|
| SW1116    | Yes              | 1                     | 1 <sup>st</sup> Generation: $2 \times 10^4$                                                                                                  | 64.46 $\mu\text{m}$  |
| SW480     | Yes              | 3                     | 1 <sup>st</sup> Generation: $9,5 \times 10^4$<br>2 <sup>nd</sup> Generation: $6 \times 10^4$<br>3 <sup>rd</sup> Generation: $12 \times 10^4$ | 56.27 $\mu\text{m}$  |
| DLD-1     | Yes              | 3                     | 1 <sup>st</sup> Generation: $11 \times 10^4$<br>2 <sup>nd</sup> Generation: $14 \times 10^4$<br>3 <sup>rd</sup> Generation: $12 \times 10^4$ | 94.13 $\mu\text{m}$  |
| SW620     | Yes              | 3                     | 1 <sup>st</sup> Generation: $9 \times 10^4$<br>2 <sup>nd</sup> Generation: $14 \times 10^4$<br>3 <sup>rd</sup> Generation: $4 \times 10^4$   | 85.6 $\mu\text{m}$   |
| HT-29     | Yes              | 3                     | 1 <sup>st</sup> Generation: $12 \times 10^4$<br>2 <sup>nd</sup> Generation: $12 \times 10^4$<br>3 <sup>rd</sup> Generation: $12 \times 10^4$ | 139.74 $\mu\text{m}$ |
| Caco-2    | Yes              | 3                     | 1 <sup>st</sup> Generation: $10 \times 10^4$<br>2 <sup>nd</sup> Generation: $8 \times 10^4$<br>3 <sup>rd</sup> Generation: $8 \times 10^4$   | 85.6 $\mu\text{m}$   |
| COLO205   | Yes              | 3                     | 1 <sup>st</sup> Generation: $5 \times 10^4$<br>2 <sup>nd</sup> Generation: $5 \times 10^4$                                                   | 54.63 $\mu\text{m}$  |

|     |     |   |                                                |          |
|-----|-----|---|------------------------------------------------|----------|
|     |     |   | 3 <sup>rd</sup> Generation: 5x10 <sup>4</sup>  |          |
|     |     |   | 1 <sup>st</sup> Generation: 3x10 <sup>4</sup>  |          |
| T84 | Yes | 3 | 2 <sup>nd</sup> Generation: 5x10 <sup>4</sup>  | 91.40 μm |
|     |     |   | 3 <sup>rd</sup> Generation: 10x10 <sup>4</sup> |          |



**Table S8. Frequencies of LGR5<sup>+</sup>/EpCAM<sup>low</sup> and EpCAM<sup>high</sup> subsets in cells disaggregated from spheres grown from colon cancer cell lines.**

| Cell<br>line <sub>sph</sub> | EpCAM <sup>high</sup> /LGR5 <sup>+</sup><br>% | EpCAM <sup>low</sup> /LGR5 <sup>+</sup><br>% |
|-----------------------------|-----------------------------------------------|----------------------------------------------|
|                             | M ± s.d.                                      | M ± s.d.                                     |
| SW1116                      | 56 ± 10.8                                     | 3.3 ± 2.6                                    |
| SW480                       | 3.2 ± 1.7                                     | 6.5 ± 4.9                                    |
| DLD-1                       | 8.23 ± 9.68                                   | 6.10 ± 9.28                                  |
| SW620                       | 0.70 ± 0.98                                   | 1.46 ± 1.51                                  |
| HT-29                       | 15.60 ± 13.73                                 | 13.34 ± 15.41                                |
| Caco-2                      | 6.85 ± 8.85                                   | 5.33 ± 6.06                                  |
| COLO205                     | 10.75 ± 7.84                                  | 12.08 ± 14.80                                |
| T84                         | 13.84 ± 15.77                                 | 7.06 ± 6.09                                  |

Cell line<sub>sph</sub>: spheres derived-cells for each cell line

M: Mean of three experiments

s.d.: Standard deviation

**Table S9. Frequencies of CD26<sup>high</sup> in cells disaggregated from spheres grown from colon cancer cell lines.**

| Cell<br>line <sub>sph</sub> | CD26 <sup>high</sup><br>%<br>M ± s.d. |
|-----------------------------|---------------------------------------|
| SW1116                      | 45.7 ± 1.5                            |
| SW480                       | -                                     |
| DLD-1                       | 0.2 ± 0.2                             |
| SW620                       | -                                     |
| HT-29                       | 8.4 ± 0.2                             |
| Caco-2                      | 11.5 ± 0.4                            |
| COLO205                     | 0.9 ± 0.1                             |
| T84                         | 30.1 ± 0.1                            |

Cell line<sub>sph</sub>: spheres derived-cells for each cell line

M: Mean of three experiments

s.d.: Standard deviation

-: Not detected

**Table S10. Frequencies of CD26/CD133 subsets in cells disaggregated from spheres grown from colon cancer cell lines.**

| Cell<br>line <sub>sph</sub> | CD26 <sup>high</sup>  |                      | CD133 <sup>high</sup> |
|-----------------------------|-----------------------|----------------------|-----------------------|
|                             | CD133 <sup>high</sup> | CD133 <sup>low</sup> | CD26 <sup>low</sup>   |
|                             | %<br>M ± s.d.         | %<br>M ± s.d.        | %<br>M ± s.d.         |
| SW1116                      | 0.15 ± 0.06           | 13.70 ± 5.53         | 0.28 ± 0.13           |
| SW480                       | -                     | -                    | 1.03 ± 1.92           |
| DLD-1                       | -                     | 0.05 ± 0.06          | 0.05 ± 0.10           |
| SW620                       | -                     | -                    | 1.05 ± 2.10           |
| HT-29                       | 0.30 ± 0.35           | 3.45 ± 1.69          | 0.43 ± 0.39           |
| Caco-2                      | 0.65 ± 0.87           | 4.00 ± 3.41          | 0.58 ± 0.57           |
| COLO205                     | 0.10 ± 0.14           | 0.2 ± 0              | 0.45 ± 0.07           |
| T84                         | 0.03 ± 0.05           | 2.00 ± 2.71          | 0.05 ± 0.06           |

Cell line<sub>sph</sub>: spheres derived-cells for each cell line

M: Mean of three experiments

s.d.: Standard deviation

-: Not detected

**Table S11. Frequencies of CD26/E-cadherin subsets in cells disaggregated from spheres grown from colon cancer cell lines.**

| Cell<br>line <sub>sph</sub> | CD26 <sup>high</sup>       |                           | E-cadherin <sup>high</sup> |
|-----------------------------|----------------------------|---------------------------|----------------------------|
|                             | E-cadherin <sup>high</sup> | E-cadherin <sup>low</sup> | CD26 <sup>low</sup>        |
|                             | %<br>M ± s.d.              | %<br>M ± s.d.             | %<br>M ± s.d.              |
| SW1116                      | 3.17 ± 6.01                | 39.67 ± 7.92              | 0.57 ± 1.15                |
| SW480                       | 0.025 ± 0.05               | 0.025 ± 0.05              | 0.15 ± 0.3                 |
| DLD-1                       | 0.05 ± 0.06                | 0.05 ± 0.06               | 2.37 ± 2.95                |
| SW620                       | -                          | -                         | -                          |
| HT-29                       | 0.75 ± 0.98                | 7.68 ± 7.52               | 2.78 ± 3.28                |
| Caco-2                      | 0.65 ± 1.10                | 4.05 ± 2.29               | 2.37 ± 4.75                |
| COLO205                     | 0.025 ± 0.05               | 0.2 ± 0.28                | 0.45 ± 0.83                |
| T84                         | 2.55 ± 4.97                | 11.25 ± 8.50              | 0.43 ± 0.61                |

Cell line<sub>sph</sub>: spheres derived-cells for each cell line

M: Mean of three experiments

s.d.: Standard deviation

-: Not detected
